# Supplementary material
Source: Springer Nature journal article supplement (https://www.springermedizin.de/resource/supplementary/13033_2013_170_MOESM3_ESM.pdf/9652034)

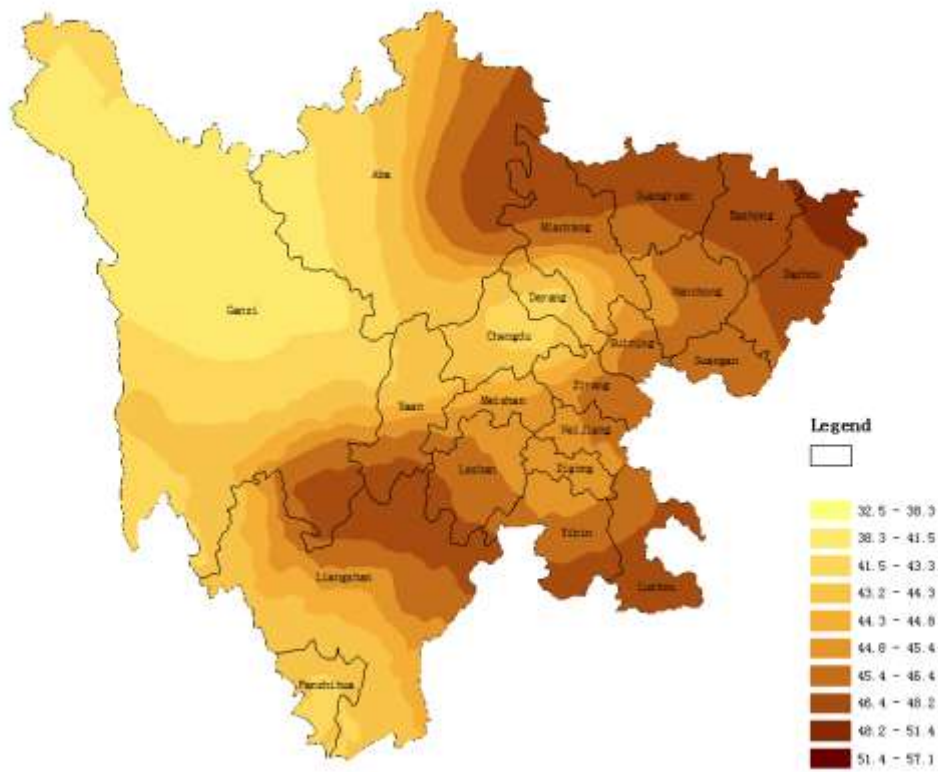

Supplement: MOESM3 [file 9652034]
